# Supplementary material
Source: publisher figshare collection journal article supplement (https://frontiersin.figshare.com/ndownloader/files/17483207)
Supplement: Supplementary file [file 17483207]

Supplemental Table.1. Primer sequences and PCR conditions for real time PCR

| Gene Target / GenBank Accession No<br>Sequences of forward & reverse primers | PCR Condition |        |           |           |          | Product Size<br>& <i>T<sub>m</sub></i> value |
|------------------------------------------------------------------------------|---------------|--------|-----------|-----------|----------|----------------------------------------------|
|                                                                              | Denature      | Anneal | Extension | Detection | Cycle No |                                              |
| <u>IGF-I proximal promoter</u> / KF199853.1                                  |               |        |           |           |          |                                              |
| F: 5'-TGACAGGGTGCCCAAAATCCTTAAT-3'                                           | 94 °C         | 53°C   | 72 °C     | 76 °C     | ×30      | 185 bp &                                     |
| R: 5'-GACTTTGTTCCATTGCGCAGGC-3'                                              | 30 sec        | 30 sec | 30 sec    | 20 sec    |          | 86.8 °C                                      |
| <u>IGF-I primary transcript</u> / KF199853.1                                 |               |        |           |           |          |                                              |
| F: 5'-GCCTCGAGATGTACTGTGCACCC-3'                                             | 94 °C         | 53°C   | 72 °C     | 79°C      | ×40      | 337 bp &                                     |
| R: 5'-TGCAGGGGAACACAATCAGTA-3'                                               | 30 sec        | 30 sec | 30 sec    | 20 sec    |          | 86.1 °C                                      |
| <u>IGF-I mRNA</u> / EU051323.1                                               |               |        |           |           |          |                                              |
| F: 5'-TCTCACTGGTGCTGTGCGTCCTCGCG-3'                                          | 94 °C         | 55 °C  | 72 °C     | 84 °C     | ×40      | 203 bp &                                     |
| R: 5'-GCTCTGAAAGCAGCATTCGTCCACAA-3'                                          | 30 sec        | 30 sec | 30 sec    | 20 sec    |          | 87.5 °C                                      |
| <u>HNF1α mRNA</u> / MH751508.1                                               |               |        |           |           |          |                                              |
| F: 5'-ATGGCAACAATGGCACAGT-3'                                                 | 94 °C         | 58 °C  | 72 °C     | 78 °C     | ×40      | 235 bp &                                     |
| R: 5'-ACGTGCCACCCGATCCAGACTTCC-3'                                            | 30 sec        | 30 sec | 30 sec    | 20 sec    |          | 84.2 °C                                      |
| <u>CREB mRNA</u> / EF437961.1                                                |               |        |           |           |          |                                              |
| F: 5'-TCAACCTTCAGTCATTCAGTCA-3'                                              | 94 °C         | 56 °C  | 72 °C     | 85°C      | ×40      | 231 bp &                                     |
| R: 5'-GTTGGCACTGTCACTGTAGTGA-3'                                              | 30 sec        | 30 sec | 30 sec    | 20 sec    |          | 84.9 °C                                      |
| <u>18S RNA</u> / HQ615531.1                                                  |               |        |           |           |          |                                              |
| F: 5'-AGCAACTTTAGTATACGCTATT-3'                                              | 94 °C         | 57 °C  | 72 °C     | 79 °C     | ×40      | 210 bp &                                     |
| R: 5'-CTGAGAAACGGCTACCACATC-3'                                               | 30 sec        | 30 sec | 30 sec    | 20 sec    |          | 85.0 °C                                      |
